# Supplementary material
Source: Springer Nature journal article supplement (https://www.springermedizin.de/resource/supplementary/13075_2004_1586_MOESM1_ESM.pdf/9690112)

## MCP-1

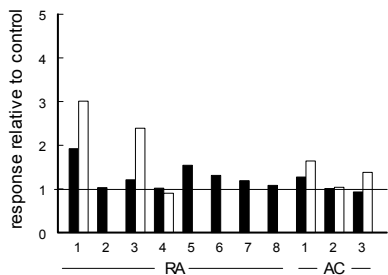

## IL-8

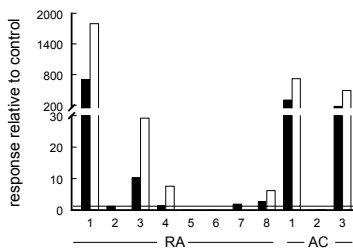

## IL-6

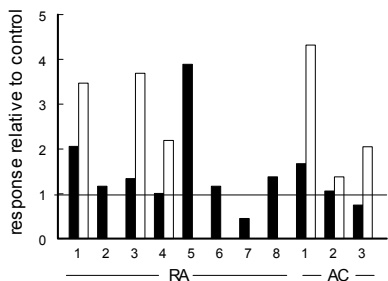

## sICAM-1

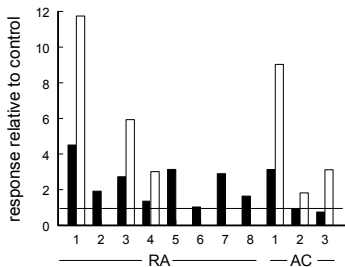

## VEGF

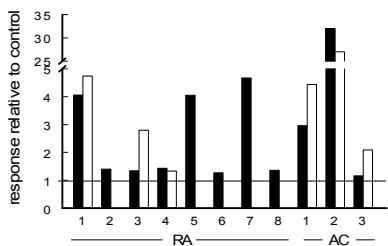

## GM-CSF

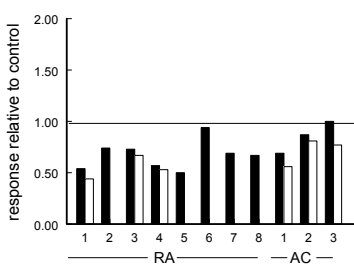

## RANTES

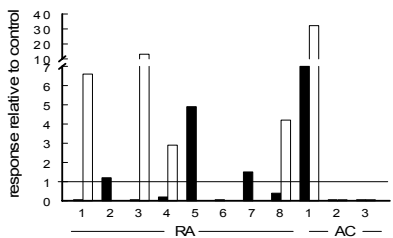

Supplement: MOESM1 [file 9690112]
